# Supplementary material for: Combined detection of serum autoantibodies as diagnostic biomarkers in esophagogastric junction adenocarcinoma
Source: PubMed Central journal article supplement (PMC6476828; doi:10.1007/s10120-018-0894-y), 2018-11-13
Supplement: 10120_2018_894_MOESM1_ESM.pdf [file 10120_2018_894_MOESM1_ESM.pdf]

**Supplementary Table 1. Diagnostic results for individual autoantibodies in EJA in the training cohort**

|                               | AUC (95%CI)         | Sensitivity | Specificity | PPV   | NPV   | PLR  | NLR  |
|-------------------------------|---------------------|-------------|-------------|-------|-------|------|------|
| <b>EJA vs. NC</b>             |                     |             |             |       |       |      |      |
| p53                           | 0.718 (0.659-0.777) | 35.2%       | 90.5%       | 72.8% | 65.9% | 3.71 | 0.72 |
| NY-ESO-1                      | 0.718 (0.658-0.779) | 37.7%       | 90.5%       | 74.1% | 66.8% | 3.97 | 0.69 |
| PRDX6                         | 0.573 (0.502-0.644) | 34.4%       | 90.5%       | 72.3% | 65.7% | 3.62 | 0.72 |
| MMP-7                         | 0.597 (0.527-0.667) | 30.3%       | 90.5%       | 69.7% | 64.3% | 3.19 | 0.77 |
| Hsp70                         | 0.652 (0.589-0.715) | 18.0%       | 90.5%       | 57.7% | 60.5% | 1.89 | 0.91 |
| Bmi-1                         | 0.686 (0.623-0.749) | 22.1%       | 90.5%       | 62.7% | 61.7% | 2.33 | 0.86 |
| <b>Early-stage EJA vs. NC</b> |                     |             |             |       |       |      |      |
| p53                           | 0.648 (0.498-0.798) | 33.3%       | 90.5%       | 27.1% | 92.7% | 3.51 | 0.74 |
| NY-ESO-1                      | 0.654 (0.507-0.802) | 27.8%       | 90.5%       | 23.7% | 92.2% | 2.93 | 0.80 |
| PRDX6                         | 0.602 (0.436-0.768) | 38.9%       | 90.5%       | 30.3% | 93.3% | 4.09 | 0.68 |
| MMP-7                         | 0.575 (0.406-0.744) | 33.3%       | 90.5%       | 27.2% | 92.7% | 3.51 | 0.74 |
| Hsp70                         | 0.697 (0.581-0.814) | 16.7%       | 90.5%       | 15.7% | 91.1% | 1.76 | 0.92 |
| Bmi-1                         | 0.685 (0.544-0.826) | 27.8%       | 90.5%       | 23.7% | 92.2% | 2.93 | 0.80 |

CI, exact confidence interval; EJA, esophagogastric junction adenocarcinoma; NC, normal controls;

NLR, negative likelihood ratio; NPV, negative predictive value; PLR, positive likelihood ratio; PPV,

positive predictive value.

**Supplementary Table 2. Diagnostic results for individual autoantibodies in EJA in the validation cohort**

|                               | AUC (95%CI)         | Sensitivity | Specificity | PPV   | NPV   | PLR   | NLR  |
|-------------------------------|---------------------|-------------|-------------|-------|-------|-------|------|
| <b>EJA vs. NC</b>             |                     |             |             |       |       |       |      |
| p53                           | 0.766 (0.691-0.841) | 35.7%       | 96.3%       | 72.8% | 65.9% | 3.71  | 0.72 |
| NY-ESO-1                      | 0.747 (0.670-0.824) | 34.3%       | 95.0%       | 74.1% | 66.8% | 3.97  | 0.69 |
| PRDX6                         | 0.647 (0.557-0.737) | 30.0%       | 90.0%       | 72.3% | 65.7% | 3.62  | 0.72 |
| MMP-7                         | 0.599 (0.505-0.694) | 24.3%       | 95.0%       | 69.7% | 64.3% | 3.19  | 0.77 |
| Hsp70                         | 0.686 (0.601-0.770) | 28.6%       | 86.3%       | 57.7% | 60.5% | 1.89  | 0.91 |
| Bmi-1                         | 0.711 (0.619-0.803) | 54.3%       | 90.0%       | 62.7% | 61.7% | 2.33  | 0.86 |
| <b>Early-stage EJA vs. NC</b> |                     |             |             |       |       |       |      |
| p53                           | 0.799 (0.705-0.893) | 40.0%       | 96.3%       | 77.2% | 83.7% | 10.81 | 0.62 |
| NY-ESO-1                      | 0.714 (0.602-0.826) | 28.0%       | 95.0%       | 63.6% | 80.9% | 5.60  | 0.76 |
| PRDX6                         | 0.629 (0.491-0.767) | 28.0%       | 90.0%       | 46.7% | 80.0% | 2.80  | 0.80 |
| MMP-7                         | 0.609 (0.460-0.757) | 28.0%       | 95.0%       | 63.6% | 80.9% | 5.60  | 0.76 |
| Hsp70                         | 0.702 (0.592-0.811) | 32.0%       | 86.3%       | 42.2% | 80.3% | 2.34  | 0.79 |
| Bmi-1                         | 0.682 (0.536-0.829) | 40.0%       | 90.0%       | 55.5% | 82.8% | 4.00  | 0.67 |

CI, exact confidence interval; EJA, esophagogastric junction adenocarcinoma; NC, normal controls;

NLR, negative likelihood ratio; NPV, negative predictive value; PLR, positive likelihood ratio; PPV,

positive predictive value.

**Supplementary Table S3. Correlation between the autoantibody panel and panel of 3 and clinicopathologic characteristics of EJA patients in the training cohort**

|                         | n   | the autoantibody panel |          |          | panel of 3   |          |          |
|-------------------------|-----|------------------------|----------|----------|--------------|----------|----------|
|                         |     | Positive (%)           | <i>X</i> | <i>P</i> | Positive (%) | <i>X</i> | <i>P</i> |
| Patient age             |     |                        |          |          |              |          |          |
| ≤ 60                    | 46  | 28 (60.9)              | 1.232    | 0.267    | 25 (54.3)    | 2.608    | 0.106    |
| > 60                    | 76  | 44 (57.9)              |          |          | 40 (52.6)    |          |          |
| Patient gender          |     |                        |          |          |              |          |          |
| Male                    | 103 | 61 (59.2)              | 0.096    | 0.757    | 56 (54.4)    | 0.002    | 0.962    |
| Female                  | 19  | 11 (57.9)              |          |          | 9 (47.4)     |          |          |
| Size of tumor           |     |                        |          |          |              |          |          |
| ≤ 5 cm                  | 49  | 31 (63.3)              | 0.476    | 0.490    | 28 (57.1)    | 0.043    | 0.836    |
| > 5 cm                  | 65  | 37 (56.9)              |          |          | 34 (52.3)    |          |          |
| Histological grade      |     |                        |          |          |              |          |          |
| Grade 1+2               | 58  | 33 (56.9)              | 1.039    | 0.595    | 29 (50.0)    | 1.472    | 0.479    |
| Grade 3                 | 47  | 30 (63.8)              |          |          | 28 (59.6)    |          |          |
| Depth of tumor invasion |     |                        |          |          |              |          |          |
| T1+T2+T3                | 34  | 20 (58.8)              | 0.791    | 0.374    | 18 (52.9)    | 1.926    | 0.165    |
| T4                      | 88  | 52 (59.1)              |          |          | 47 (53.4)    |          |          |
| Lymph node metastasis   |     |                        |          |          |              |          |          |
| Positive                | 94  | 57 (60.6)              | 0.065    | 0.799    | 51 (54.3)    | 0.804    | 0.370    |
| Negative                | 28  | 15 (53.6)              |          |          | 14 (50.0)    |          |          |
| TNM stage               |     |                        |          |          |              |          |          |
| I + II                  | 18  | 7 (38.9)               | 0.724    | 0.696    | 10 (55.6)    | 3.347    | 0.188    |
| III+IV                  | 104 | 63 (60.6)              |          |          | 55 (52.9)    |          |          |

**Supplementary Table S4. Correlation between the autoantibody panel and panel of 3 and clinicopathologic characteristics of EJA patients in the validation cohort**

|                         | n  | the autoantibody panel |          |          | panel of 3   |          |          |
|-------------------------|----|------------------------|----------|----------|--------------|----------|----------|
|                         |    | Positive (%)           | <i>X</i> | <i>P</i> | Positive (%) | <i>X</i> | <i>P</i> |
| Patient age             |    |                        |          |          |              |          |          |
| ≤ 60                    | 24 | 15 (62.5)              | 0.018    | 0.894    | 14 (58.3)    | 0.042    | 0.837    |
| > 60                    | 46 | 28 (60.9)              |          |          | 28 (60.9)    |          |          |
| Patient gender          |    |                        |          |          |              |          |          |
| Male                    | 55 | 34 (61.8)              | 0.016    | 0.898    | 33 (60.0)    | 0.000    | 1.000    |
| Female                  | 15 | 9 (60.0)               |          |          | 9 (60.0)     |          |          |
| Size of tumor           |    |                        |          |          |              |          |          |
| ≤ 5 cm                  | 37 | 24 (64.9)              | 0.952    | 0.329    | 24 (64.9)    | 1.694    | 0.282    |
| > 5 cm                  | 23 | 12 (52.2)              |          |          | 11 (47.8)    |          |          |
| Histological grade      |    |                        |          |          |              |          |          |
| Grade 1+2               | 33 | 18 (54.5)              | 2.498    | 0.114    | 18 (54.5)    | 1.555    | 0.212    |
| Grade 3                 | 24 | 18 (75.0)              |          |          | 17 (70.8)    |          |          |
| Depth of tumor invasion |    |                        |          |          |              |          |          |
| T1+T2+T3                | 55 | 31 (56.4)              | 2.779    | 0.096    | 30 (54.5)    | 3.182    | 0.074    |
| T4                      | 15 | 12 (80.0)              |          |          | 12 (80.0)    |          |          |
| Lymph node metastasis   |    |                        |          |          |              |          |          |
| Positive                | 45 | 28 (62.2)              | 0.033    | 0.855    | 28 (62.2)    | 0.259    | 0.611    |
| Negative                | 25 | 15 (60.0)              |          |          | 14 (56.0)    |          |          |
| TNM stage               |    |                        |          |          |              |          |          |
| I +II                   | 24 | 13 (54.2)              | 0.813    | 0.367    | 13 (54.2)    | 0.518    | 0.472    |
| III+IV                  | 46 | 30 (65.2)              |          |          | 29 (63.0)    |          |          |

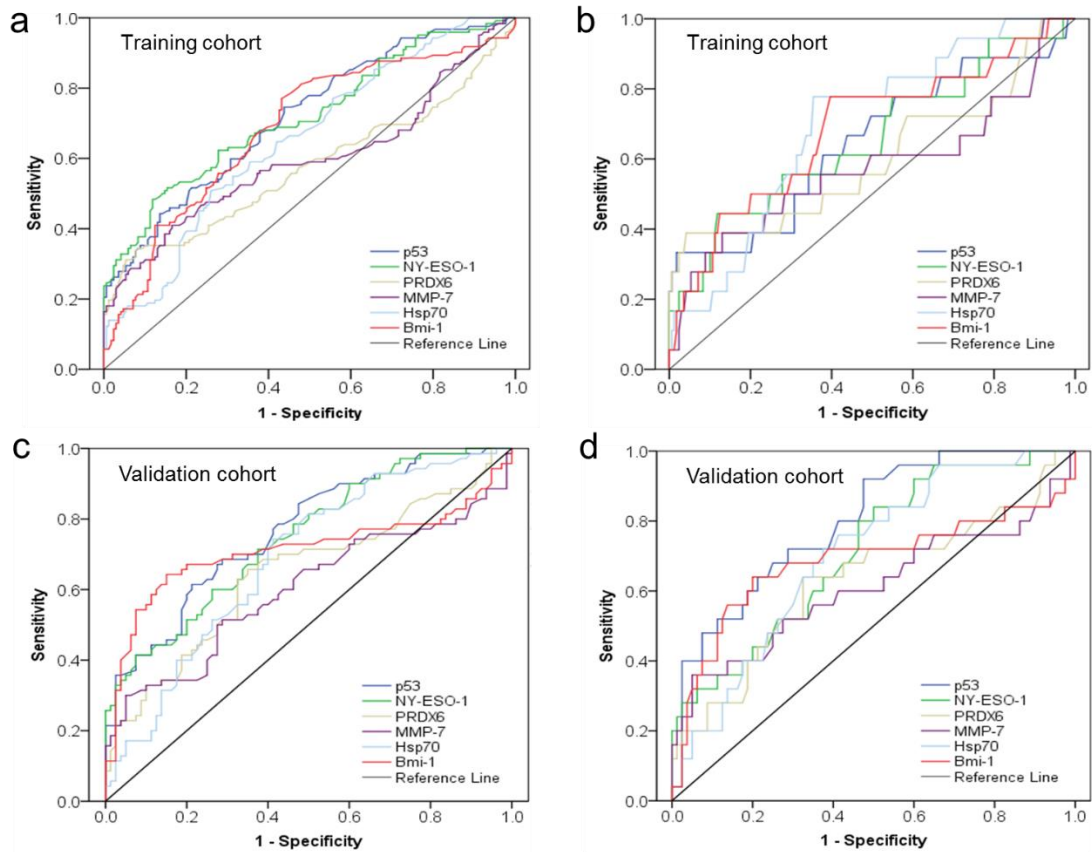

**Supplementary Figure 1 Performance of individual autoantibodies to detect EJA.** A. ROC curve for autoantibodies against p53, NY-ESO-1, PRDX6, MMP-7, Hsp70 and Bmi-1 for all patients with EJA versus normal controls in training cohort. B. ROC curve for autoantibodies against p53, NY-ESO-1, PRDX6, MMP-7, Hsp70 and Bmi-1 for patients with early-stage EJA versus normal controls in training cohort. C. ROC curve for autoantibodies against p53, NY-ESO-1, PRDX6, MMP-7, Hsp70 and Bmi-1 for all patients with EJA versus normal controls in validation cohort. D. ROC curve for autoantibodies against p53, NY-ESO-1, PRDX6, MMP-7, Hsp70 and Bmi-1 for patients with early-stage EJA versus normal controls in validation cohort. EJA, esophagogastric junction adenocarcinoma.

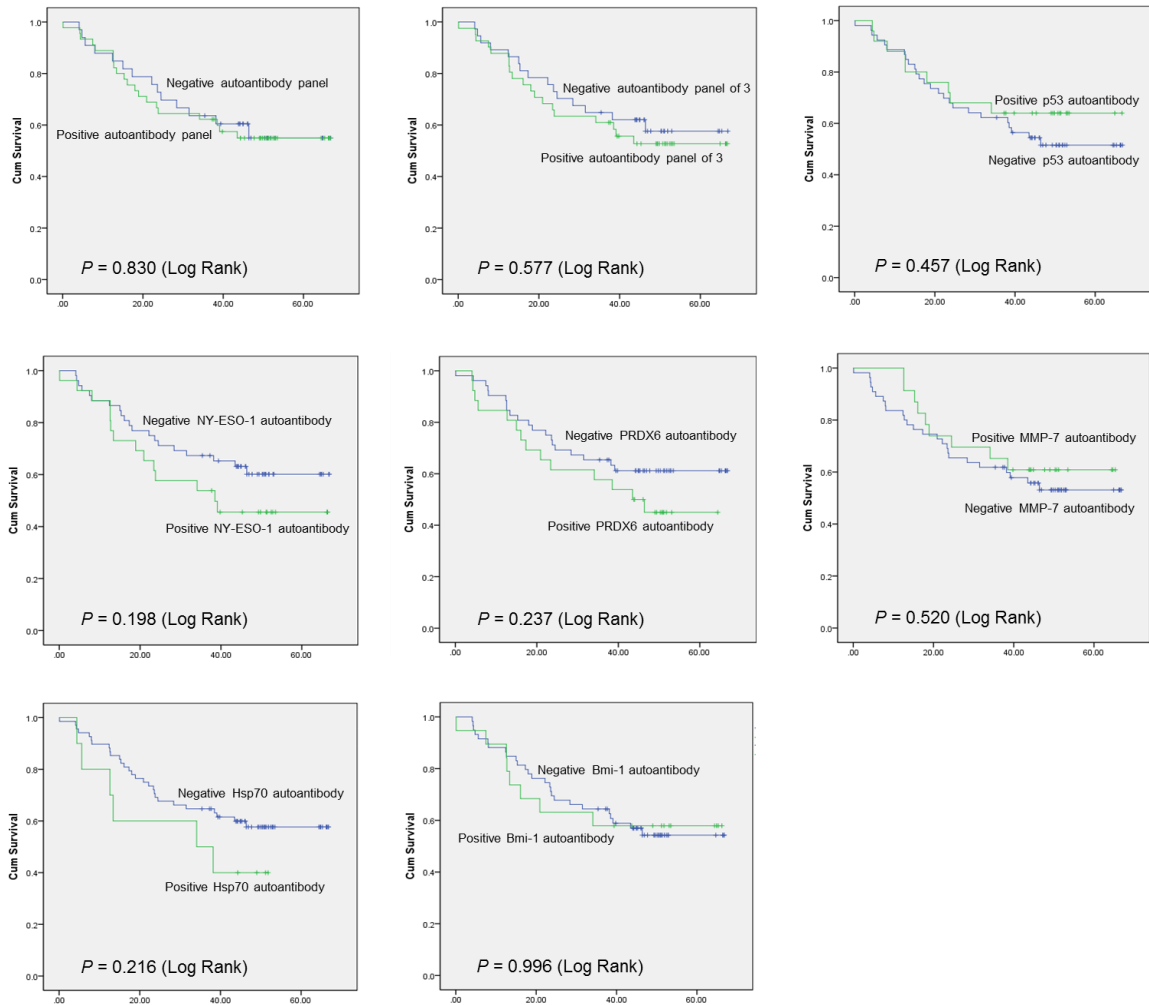

**Supplementary Figure 2** Kaplan-Meier analysis of the overall survival of patients with esophagogastric junction adenocarcinoma according to autoantibody levels. Panel: autoantibodies against six tumor-associated antigens. Panel of 3: autoantibodies against p53, NY-ESO-1 and Bmi-1.
